# Supplementary material for: Effects of THAM Nasal Alkalinization on Airway Microbial Communities: A Pilot Study
Source: bioRxiv or medRxiv preprint supplement (doi:10.1101/2021.02.14.21251657), 2021-02-16
Supplement: Supplementary file [file media-1.pdf]

# Suppl. Fig. 1

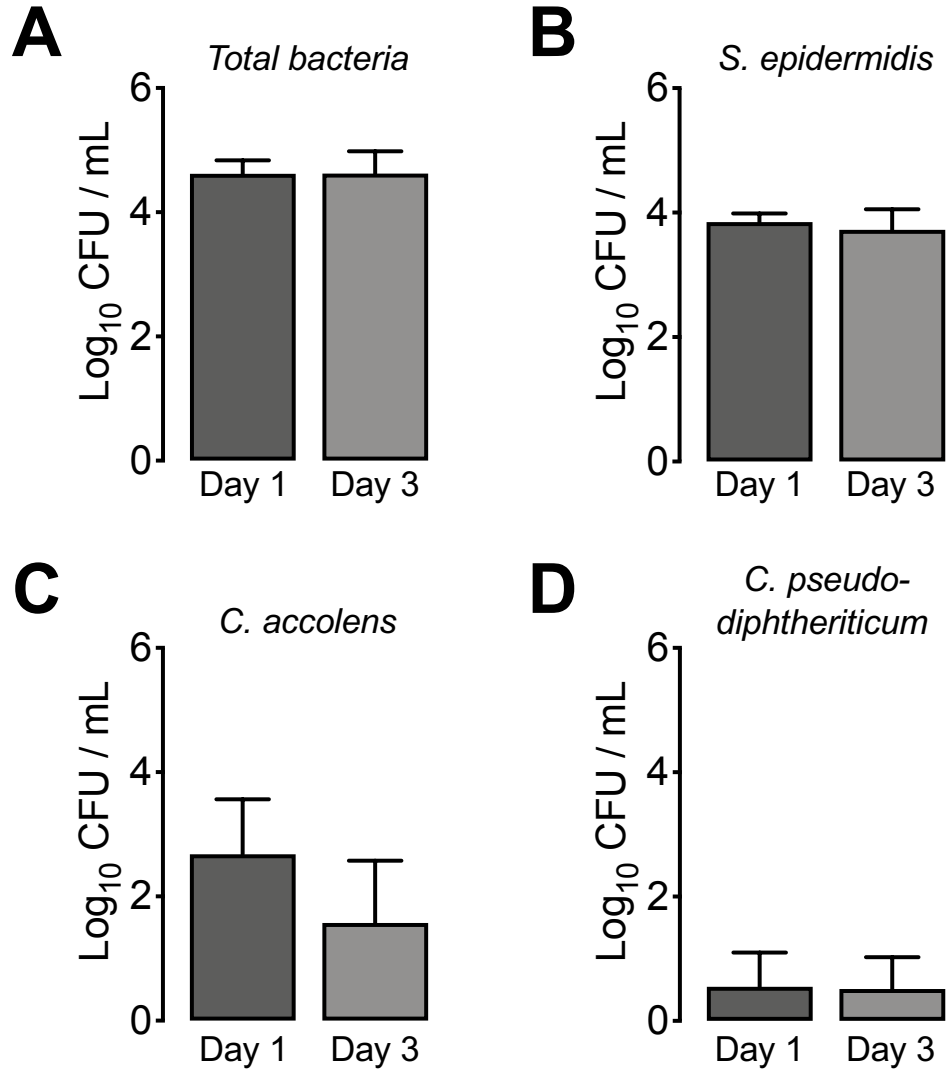

**Supplemental Figure 1. Human Nasal Bacterial Abundance and Composition are Stable.** Quantification of (A) total nasal bacteria, (B) *S. epidermidis*, (C) *C. accolens*, and (D) *C. pseudodiphtheriticum* in human subjects. Both nares were swabbed and bacterial counts quantified using standard microbiology techniques on day 1 and day 3. n=6 subjects. Bars are mean ± SEM

## Suppl. Fig. 2

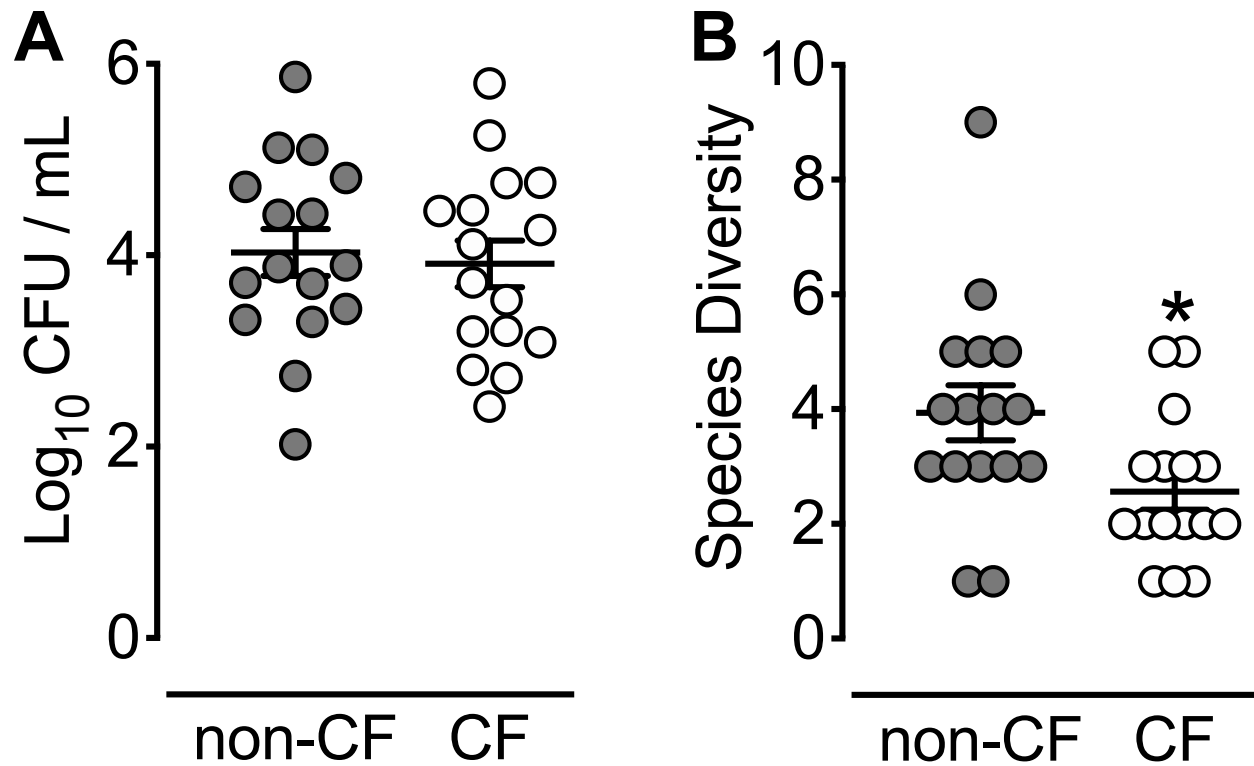

**Supplemental Figure 2. Baseline Nasal Swab Bacterial Counts and Species Diversity in Non-CF and CF Subjects.** (A) Bacterial counts obtained with nasal swabs. (B) Bacterial species diversity. Diversity was determined by summing individual bacterial species from each subject. Each data point indicates nasal swab data from a different subject. Horizontal bars represent mean  $\pm$  SEM. \* denotes  $P < 0.05$ .

# Suppl. Table 1

| Participant Compliance and Adverse Events |                        |           |                          |           |
|-------------------------------------------|------------------------|-----------|--------------------------|-----------|
|                                           | non-CF                 |           | CF                       |           |
| <b>Participant Compliance</b>             |                        |           |                          |           |
| Saline, THAM (SD)                         | 23.3 (1.5), 23.4 (1.6) |           | 23.9 (0.25), 23.9 (0.25) |           |
| total # doses = 24                        |                        |           |                          |           |
|                                           | non-CF                 |           | CF                       |           |
| <b>Adverse Events</b>                     | Saline                 | THAM      | Saline                   | THAM      |
| total number (%)                          | 1 (6.25%)              | 1 (6.25%) | 3 (18.75%)               | 1 (6.25%) |
|                                           |                        |           |                          |           |
| <b>Mild</b>                               | 1                      | 1         | 3                        | 0         |
|                                           |                        |           |                          |           |
| Cough                                     | 0                      | 0         | 1                        | 0         |
| Chest tightness                           | 1                      | 0         | 0                        | 0         |
| Shortness of breath                       | 0                      | 0         | 2                        | 0         |
| Stuffy nose                               | 0                      | 0         | 0                        | 0         |
| Sneezing                                  | 0                      | 1         | 0                        | 0         |
|                                           |                        |           |                          |           |
| <b>Moderate</b>                           | 0                      | 0         | 0                        | 1         |
|                                           |                        |           |                          |           |
| Back pain                                 | 0                      | 0         | 0                        | 1         |
|                                           |                        |           |                          |           |
| <b>Serious</b>                            | 0                      | 0         | 0                        | 0         |
|                                           |                        |           |                          |           |

# Suppl. Table 2

| Most Frequently Isolated Bacterial Species  |                                           |
|---------------------------------------------|-------------------------------------------|
| non-CF: Gram (+) bacteria                   | CF: Gram (+) bacteria                     |
| <i>Corynebacterium accolens</i>             | <i>Corynebacterium accolens</i>           |
| <i>Corynebacterium pseudodiphtheriticum</i> | <i>Corynebacterium tuberculostearicum</i> |
| <i>Corynebacterium tuberculostearicum</i>   | <i>Enterococcus faecalis</i>              |
| <i>Staphylococcus aureus</i>                | <i>Rhodotorula mucilaginosa</i>           |
| <i>Staphylococcus capitis</i>               | <i>Staphylococcus aureus</i>              |
| <i>Staphylococcus epidermidis</i>           | <i>Staphylococcus capitis</i>             |
| <i>Staphylococcus haemolyticus</i>          | <i>Staphylococcus epidermidis</i>         |
| <i>Staphylococcus hominis</i>               | <i>Streptococcus oralis</i>               |
| <i>Staphylococcus pasteurii</i>             | <i>Streptococcus parasanguinis</i>        |
| <i>Staphylococcus warneri</i>               | <i>Streptococcus sanguinis</i>            |
|                                             |                                           |
| non-CF: Gram (–) bacteria                   | CF: Gram (–) bacteria                     |
| <i>Actinomyces oris</i>                     | <i>Achromobacter xylosoxidans</i>         |
| <i>Escherichia coli</i>                     | <i>Klebsiella pneumonia</i>               |
| <i>Haemophilus parainfluenzae</i>           | <i>Pantoea eucrina</i>                    |
| <i>Klebsiella pneumonia</i>                 | <i>Pseudomonas aeruginosa</i>             |
| <i>Moraxella nonliquifaciens</i>            | <i>Serratia marcescens</i>                |
|                                             |                                           |
